# Supplementary material
Source: PubMed Central journal article supplement (PMC3356631)
Supplement: 1204509109_pnas.201204509SI.pdf [file 1204509109_pnas.201204509SI.pdf]

# Supporting Information

Kishi et al. 10.1073/pnas.1204509109

## SI Materials and Methods

**Mice.** C57BL/6, BALB/c, and MRL/lpr mice were purchased from Sankyo Labo Service. The conventional Tg mice expressing the H chain of anti-DNA antibody 56R or 3H9 on the BALB/c background (1, 2) and CD40LTg mice on the C57BL/6 background (3) were described previously. 56R Tg and CD40L/56R double Tg mice on the (BALB/c × C57BL/6) F1 background were used through out this study except for the experiment shown in Fig. 4, where 56R Tg mice on the BALB/c background were used. Mice were maintained under specific pathogen-free (SPF) conditions in our animal facility. All procedures followed the guidelines of the Tokyo Medical and Dental University for animal research and were approved by the animal ethics committee.

**Flow Cytometry.** Cells were stained with the following antibodies and reagents: FITC-conjugated goat anti-mouse IgM (Southern Biotechnology), Alexa Fluor 647-conjugated anti-mouse B220, APC-conjugated rat anti-mouse CD21 (BD Pharmingen, BD Biosciences), PE-conjugated rat anti-mouse CD23 (eBioscience), PerCP-conjugated streptavidin (BD Pharmingen), Alexa Fluor 488, or Pacific Blue-conjugated anti-56R/V $\kappa$ 21D (IgG1), Alexa Fluor 488 or Pacific Blue-conjugated anti-56R/V $\kappa$ 38C (IgG2b), and FITC-conjugated rat anti-mouse CD5 (eBioscience). Cells were analyzed on a CyAn ADP flow cytometer (Beckman Coulter).

**ELISA.** Total serum IgM was measured by standard sandwich ELISA analysis using goat anti-mouse IgM (Southern Biotechnology). dsDNA was generated by treating bovine thymus DNA (Nacalai Tesque) with S1 nuclease (Takara) (4), followed by dialysis with PBS. ssDNA was prepared by boiling PBS containing dsDNA for 5 min, followed by ice-bath immersion. ELISA plates were coated with 10  $\mu$ g/mL ssDNA or 10  $\mu$ g/mL histone type II-S from calf thymus (Sigma) at 4 °C. Alternatively, ELISA plates were coated with 10  $\mu$ g/mL dsDNA in the presence of poly L-lysine (Sigma). ELISA plates coated with Sm/RNP were prepared by incubating the plates with 10 U/mL Sm/RNP (ImmunoVision) or purchased from Orgentec. ELISA plates coated with the components of Sm/RNP were prepared by incubating the plates with 10  $\mu$ g/mL recombinant U1-RNP-70kD, U1-RNP-A, U1-RNP-C or SmB/B' proteins (gifts from T. Hachiya, MBL, Ina, Nagano, Japan), or the SmD1(83-119) peptide synthesized as free peptides according to the protocol described previously (5) and purified by reverse-phase chromatography. Plates were blocked with PBS containing 0.5% FCS and 0.05% NaN<sub>3</sub> at room temperature for 2 h, and sequentially diluted sera or culture supernatants were incubated in the plates at room temperature for 30 min. After further incubation with alkaline phosphatase-conjugated goat anti-mouse IgM (Southern Biotechnology) at room temperature for 1 h, plates were developed by phosphatase substrate (Sigma). Concentrations of anti-ssDNA antibodies and anti-Sm/RNP antibodies were determined relative to standard curves of anti-DNA monoclonal antibody BW28-20 (IgM; a gift from S. Hirose, Juntendo University, Tokyo, Japan) and pooled MRL/lpr sera, respectively. The absorbance was measured by an ELISA reader  $V_{\max}$  (Molecular Devices) at 405 nm and analyzed with SoftMax Pro-4.8 (Molecular Devices).

**ANA Test.** Cos-7 cells were placed on slide glass and fixed by immersion in 85% (vol/vol) ethanol/15% (vol/vol) acetate at room temperature for 30 min. After blocking with blocking buffer (PBS containing 0.5% FCS, 0.05% NaN<sub>3</sub>), hybridoma culture super-

natants or mouse sera were applied neat and incubated at room temperature for 30 min. Slides were then washed twice in PBS at room temperature and incubated with 20  $\mu$ g/mL FITC-conjugated goat anti-mouse IgM (Southern Biotechnology) together with 4',6-diamino-2-phenylindole (DAPI) (Sigma) for staining nuclei at room temperature for 20 min and observed under a fluorescence microscope (Leica) or a confocal laser-scanning microscope LSM510 (Carl Zeiss).

**Immunohistochemistry.** Tissues were embedded in Tissue-Tek O.C. T. compound (Sakura), snap-frozen in liquid nitrogen, and stored at -80 °C. Cryostat sections of 5  $\mu$ m in thickness were mounted onto slide glass, air dried, and fixed in acetone at room temperature for 20 min. The sections were incubated with blocking buffer (PBS containing 2.0% (wt/vol) BSA, 0.05% NaN<sub>3</sub>) for 30 min and were stained at room temperature for 60 min with Alexa Fluor 647-conjugated rat anti-mouse IgD (BioLegend), biotin-conjugated rat anti-mouse MOMA-1 (BMA Biomedicals), Alexa Fluor 594-conjugated streptavidin (Invitrogen), Alexa Fluor 488-conjugated anti-56R/V $\kappa$ 21D or anti-56R/V $\kappa$ 38C, Pacific Blue-conjugated anti-56R/V $\kappa$ 21D or anti-56R/V $\kappa$ 38C, and Alexa Fluor 647-conjugated rat anti-mouse B220. For detection of apoptosis, the sections were fixed in acetone at room temperature for 5 min, incubated with blocking buffer (PBS containing 2.0% (wt/vol) BSA, 0.05% NaN<sub>3</sub>) for 30 min, and then stained for 60 min with Alexa Fluor 488 or Pacific Blue-conjugated anti-56R/V $\kappa$ 38C and biotin-conjugated rat anti-human IgG1 (BD Pharmingen) or biotin-conjugated rat anti-mouse MOMA-1. After washing with PBS, the sections were treated with 4% (wt/vol) paraformaldehyde at room temperature for 5 min, and were permeabilized in 0.1% Triton X-100 /0.1% sodium citrate for 2 min on ice. The sections were then stained at room temperature for 60 min with rabbit anti-human/mouse active caspase 3 (R&D Systems), Alexa Fluor 647-conjugated goat anti-rabbit IgG (Invitrogen), Alexa Fluor 594-conjugated streptavidin, FITC-conjugated goat anti-mouse lambda (Southern Biotechnology), and Pacific Blue-conjugated rat anti-mouse B220. The sections were analyzed with a confocal laser-scanning microscope LSM510 (Carl Zeiss).

**Generation of Anti-Idiotypic Antibody to 56R/V $\kappa$ 38C and 56R/V $\kappa$ 21D.** BALB/c mice were immunized with keyhole limpet hemocyanin (KLH) (Sigma) conjugated with the purified antibodies from the hybridoma D568 expressing the 56R H chain and V $\kappa$ 38C and the hybridoma 1-1-7 expressing the 56R H chain and V $\kappa$ 21D generated in this study from 56R and CD40L/56R mice, respectively. Spleen cells were fused with the PAI myeloma cell line (6), and hybridomas secreting anti-idiotypic antibodies were screened by solid-phase ELISA. ELISA plates were coated with 10  $\mu$ g/mL 1-1-7 and D568 antibodies at room temperature for 1 h, and hybridoma supernatants were added. Binding was detected using alkaline phosphatase-conjugated goat anti-mouse IgG antibody (Southern Biotechnology). For determining the specificity of anti-idiotypic antibody, ELISA plates were coated with 10  $\mu$ g/mL purified antibodies from positive hybrids and then incubated with supernatants from hybridomas expressing various V $\kappa$  genes generated in this study (Table S1). Binding was detected using alkaline phosphatase-conjugated goat anti-mouse IgM antibody (Southern Biotechnology). Anti-idiotypic antibodies were conjugated with Alexa Fluor 488 or Pacific Blue using labeling kits (Invitrogen).



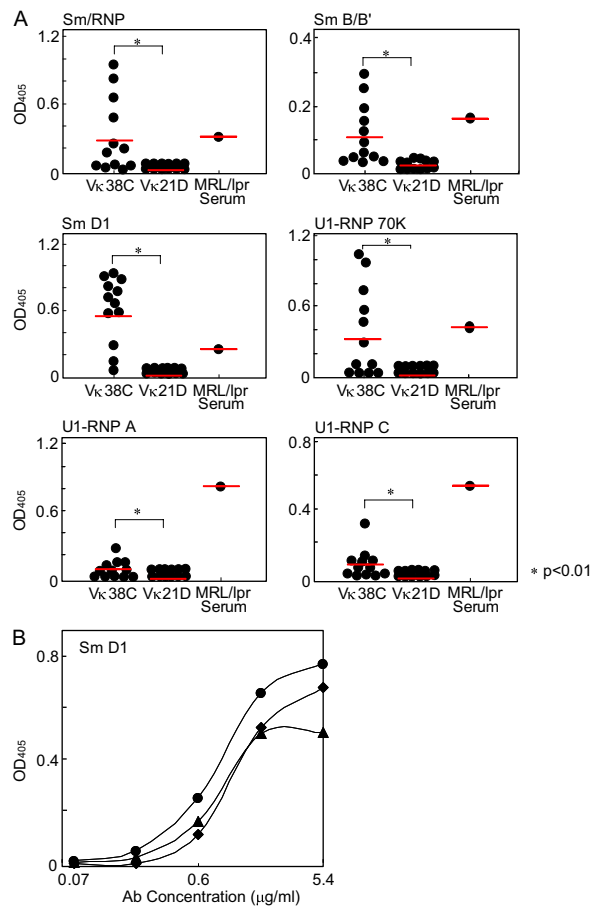

**Fig. S2.** Binding specificities of Vκ38C<sup>+</sup> antibodies to the components of Sm/RNP antibodies. Twelve Vκ38C<sup>+</sup> and 12 Vκ21D<sup>+</sup> hybridomas were randomly selected from hybridomas obtained from 56R and CD40L/56R. Antibodies from these hybridomas were diluted to 2.3 μg/mL and analyzed by ELISA using Sm/RNP, U1-RNP-70kD, U1-RNP-A, U1-RNP-C, and SmB/B' proteins and SmD1 peptide-containing residues 89–113 as antigens (A). Sera from MRL mice diluted for 100 times was used as a control. Horizontal red lines represent mean values. Dose–response curves of ELISA for binding to SmD1 peptide are shown for three Vκ38C<sup>+</sup> antibodies that most strongly bind to the SmD1 peptide (B).

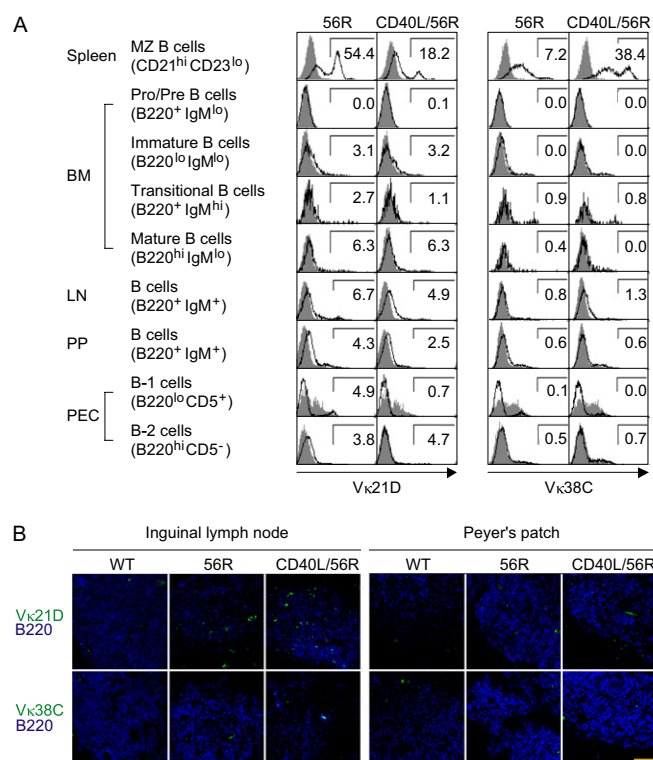

**Fig. S3.** Analysis of various lymphoid organs from 56R and CD40L/56R mice. (A) Flow cytometric analysis. Cells from bone marrow (BM), inguinal lymph node (LN), Peyer patch (PP), and peritoneal exudate (PEC) obtained from 20- to 24-wk-old mice were stained with Alexa Fluor 488 (LN, PP, and PEC) or Pacific Blue (BM)-conjugated anti-56R/V $\kappa$ 21D or anti-56R/V $\kappa$ 38C antibody (open histograms) together with Alexa Fluor 647-conjugated rat anti-mouse B220 antibody and either FITC-conjugated rat anti-mouse CD5 antibody (PEC), the combination of biotin-conjugated goat anti-mouse IgM antibody and PerCP-conjugated streptavidin (LN and PP), or FITC-conjugated goat anti-mouse IgM antibody (BM). Histograms of cells from each organ of WT (C57BL/6  $\times$  BALB/c) F1 mice are shown as negative controls (shaded histograms), and those of spleen MZ B cells from 56R and CD40L/56R mice stained as in Fig. 3B are shown as positive controls. Note that anti-idiotypic antibodies show weak reactivity to non-V $\kappa$ 21D non-V $\kappa$ 38C B cells in 56R mice (see Fig. 3B). Percentages of V $\kappa$ 21D $^{+}$  and V $\kappa$ 38C $^{+}$  cells in corresponding B-cell populations are indicated. Representative data of three experiments are shown. (B) Immunohistological analysis. Sections of inguinal lymph nodes and intestine from 16- to 24-wk-old mice were stained for 56R/V $\kappa$ 21D or 56R/V $\kappa$ 38C idiotypes together with B220. [Scale bar (yellow line): 50  $\mu$ m.] Representative data of three experiments are shown.

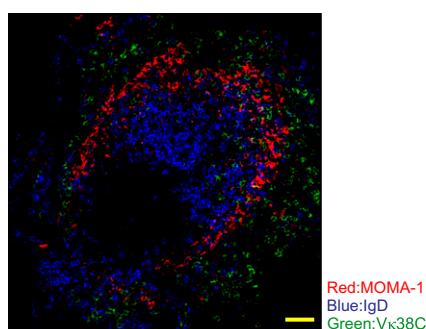

**Fig. S4.**  $V\kappa 38C^+$  B cells are not located in T/B boundary in spleen. Spleen sections from 16- to 20-wk-old 56R mice were stained for MOMA-1 (red), IgD (blue) and  $V\kappa 38C$  (green), and analyzed by confocal microscopy. Note that the image is a composite figure. [Scale bar (yellow line): 50  $\mu m$ .]

**Table S1. Use of Ig L chain and V $\kappa$  in hybridomas from 56R and CD40L/56R mice**

| Mice            | $\kappa$ Chain |                |               |                  |        | $\lambda$ Chain | Total   |
|-----------------|----------------|----------------|---------------|------------------|--------|-----------------|---------|
|                 | V $\kappa$ 21D | V $\kappa$ 38C | V $\kappa$ 20 | V $\kappa$ 12/13 | Others |                 |         |
| 56R (age)       |                |                |               |                  |        |                 |         |
| 8 wk            | 27 (0)         | 2 (2)          | 3 (0)         | 1 (0)            | 4 (1)  | 4 (0)           | 41 (3)  |
| 33 wk           | 15 (0)         | 1 (1)          | 0 (0)         | 1 (0)            | 2 (0)  | 0 (0)           | 19 (1)  |
| CD40L/56R (age) |                |                |               |                  |        |                 |         |
| 8 wk            | 29 (0)         | 7 (7)          | 6 (1)         | 0 (0)            | 6 (4)  | 4 (1)           | 52 (13) |
| 33 wk           | 13 (0)         | 10 (10)        | 2 (0)         | 0 (0)            | 3 (3)  | 2 (2)           | 30 (15) |

Data represent number of hybridomas. Numbers in parenthesis indicate the numbers of hybridomas secreting anti-dsDNA antibody. Others, other V $\kappa$ .

**Table S2. Specificity of anti-idiotypic antibodies that recognizes V $\kappa$ 21D or V $\kappa$ 38C together with 56R H chain**

| L chain          | No. of hybridomas | Reactivity              |                         |
|------------------|-------------------|-------------------------|-------------------------|
|                  |                   | Anti-56R/V $\kappa$ 21D | Anti-56R/V $\kappa$ 38C |
| V $\kappa$ 2     | 1                 | 0 (0)                   | 0 (0)                   |
| V $\kappa$ 12/13 | 1                 | 0 (0)                   | 0 (0)                   |
| V $\kappa$ 19    | 2                 | 1 (50)                  | 0 (0)                   |
| V $\kappa$ 20    | 6                 | 0 (0)                   | 0 (0)                   |
| V $\kappa$ 21D   | 47                | 47 (100)                | 0 (0)                   |
| V $\kappa$ 38C   | 14                | 0 (0)                   | 14 (100)                |
| $\lambda$        | 6                 | 0 (0)                   | 0 (0)                   |
| Others           | 9                 | 2 (22)                  | 0 (0)                   |

Data represent number of hybridomas. Numbers in parenthesis indicate percentages. Others, all other light chains.

**Table S3. Primer list**

| Primer              | Sequence                                    | Reference |
|---------------------|---------------------------------------------|-----------|
| VH                  |                                             |           |
| Sense               |                                             |           |
| VH3H9/56R-F         | CTG TCA GGA ACT GCA GGT AAG G               | 1         |
| Antisense           |                                             |           |
| VH3H9/56R-R         | CAT AAC ATA GGA ATA TTT ACT CCT CGC         | 1         |
| V $\kappa$          |                                             |           |
| Sense               |                                             |           |
| V $\kappa$ 12/13    | CGA GCA AGT GAG AAT ATT TAC AGT AAT TTA GC  | 2         |
| V $\kappa$ 20       | ACC AGC ACT GAT ATT GAT GAT                 | 3         |
| V $\kappa$ 21D      | GCC AGC CAA AGT GTT GAT TAT G               | 3         |
| V $\kappa$ 38C      | AAG GCA AGC CAA GAC ATT AAC AAG TAT ATA GCT | 3         |
| V $\kappa$ s        | GGC TGC AGS TTC AGT GGC AGT GGR TCW GGR AC  | 4         |
| Leader 5            | CCA GAT GTG AGC TCG TGA TGA CCC AGA CTC CA  | 5         |
| Antisense           |                                             |           |
| J $\kappa$ 2        | GGT TAG ACT TAG TGA ACA AGA GTT GAG AA      | 6         |
| J $\kappa$ 4        | TTC CAA CTT TGT CCC CGA GCC GAA CGT G       | 2         |
| J $\kappa$ 5        | TGC CAC GTC AAC TGA TAA TGA GCC CTC TC      | 6         |
| C $\kappa$ Deletion |                                             |           |
| Sense               |                                             |           |
| V $\kappa$ s        | GGC TGC AGS TTC AGT GGC AGT GGR TCW GGR AC  | 4         |
| Antisense           |                                             |           |
| RS101               | ACA TGG AAG TTT TCC CGG GAG AAT ATG         | 7         |

- Erikson J, et al. (1991) Expression of anti-DNA immunoglobulin transgenes in non-autoimmune mice. *Nature* 349:331–334.
- Prak EL, Trounstein M, Huszar D, Weigert M (1994) Light chain editing in kappa-deficient animals: A potential mechanism of B cell tolerance. *J Exp Med* 180:1805–1815.
- Li H, Jiang Y, Prak EL, Radic M, Weigert M (2001) Editors and editing of anti-DNA receptors. *Immunity* 15:947–957.
- Schlissel MS, Baltimore D (1989) Activation of immunoglobulin kappa gene rearrangement correlates with induction of germline kappa gene transcription. *Cell* 58:1001–1007.
- Huse WD, et al. (1989) Generation of a large combinatorial library of the immunoglobulin repertoire in phage lambda. *Science* 246:1275–1281.
- Ramsden DA, Paige CJ, Wu GE (1994) Kappa light chain rearrangement in mouse fetal liver. *J Immunol* 153:1150–1160.
- Retter MW, Nemazee D (1998) Receptor editing occurs frequently during normal B cell development. *J Exp Med* 188:1231–1238.
